# Supplementary material for: Associations Between Long‐Term Fine Particulate Matter Exposure and Mortality in Heart Failure Patients
Source: PubMed Central journal article supplement — J Am Heart Assoc. 2020 Feb 16;9(6):e012517. doi: 10.1161/JAHA.119.012517 (PMC7335509; doi:10.1161/jaha.119.012517), 2020-02-16

# **SUPPLEMENTAL MATERIAL**

## **Data S1.**

### **Expanded Methods**

#### **Geocoding Procedure:**

We obtained patient addresses from two medical records datasets: the Epic® electronic health record (EHR) dataset contained 112,519 addresses from visits occurring from 2014 to 2016; the homegrown WebCIS (legacy) EHR dataset contained 63,856 addresses from visits prior to 2014. We began cleaning data by standardizing variable formats. The variables included two text variables for address lines 1 (street address) and 2 (apartment or unit number), a text variable for city, a text variable for state, and a numeric variable for zip/postal code. We then removed duplicate addresses: the exact same text entered as an address two or more times for a single participant (“Main St” and “Main Street” would not be considered duplicates at this stage). This reduced our number of addresses to 86,616 in the Epic® EHR dataset and 58,905 in legacy. Both datasets underwent initial geocoding using proc geocode in SAS version 9.4 (SAS Institute Inc. Cary, NC). We matched addresses to latitude and longitude using street lookup data from SAS MapsOnline, which was generated from the US Census Bureau’s TIGER/Line shapefiles. SAS proc geocode detects and corrects for minor textual variants, such as common spelling errors and abbreviations. Epic® and legacy data were then merged based on level of initial geocoding match: street level (n = 101 594), zip code level (n = 43 285), city level (n = 500), or unmatched (n = 142).

We then cleaned data to improve the level of matching for addresses not matched to the street level, where possible. We began by cleaning data with addresses that were unmatched. Various

indicators of null address elements (“unknown”, “none”, “NA”, etc.) were standardized to all read “NULL”. Then, observations were separated into those with no valid address information and those with partial information (i.e. only zip code). Those with partial address information were merged to the city matched dataset, while those with no valid address information were kept as unmatched.

For those addresses in the city matched dataset, we standardized null address elements as above, standardized the spelling of PO Box, and removed punctuation from text fields. PO Boxes are Post Office Boxes, for individuals who receive mail at a Post Office instead of their home. PO Box addresses can be geocoded to zip code, but not street address. We assumed that PO Boxes were located in the same zip code where a patient resided. We then identified likely mistakes in which the listed city was a near but not exact match to the listed zip code and corrected the zip code. We then re-geocoded city matched addresses. Those who matched to zip code at this point were merged with the zip code matched dataset.

For those addresses matched to zip code, we standardized null address elements as above, standardized the spelling of PO Box, removed punctuation, corrected obvious misspellings and unconventional abbreviations, and standardized indicators of homelessness. Many individuals experiencing homelessness have listed a zip code where they typically stay, although they may be transient. Some participants listed both a PO Box and a street address. For those individuals, we attempted to geocode the street address. We then standardized text fields of data entries including apartments. If street address and apartment number were entered in an unconventional format (i.e. listing apartment number before street address), we attempted to extract the street

address and re-geocode the address. Then, for any addresses with text on the second address line, we attempted to geocode the second address line. Any addresses that were re-geocoded to street level at this stage were merged to street level matches.

For street level matches, we corrected the address of a common senior living community that geocoded incorrectly in some instances. At this point, we removed duplicate addresses: multiple addresses matched to the same street (for street level matches) or zip code (for zip code level matches) for the same participant. We then matched participants to their “best” address(es), by source and by matching level. We created a dummy dataset with one observation per participant (n = 41 913). We first matched participants to addresses from Epic® that were street matches. If there were multiple unique addresses per participant, we kept all addresses (n = 32 614 addresses). If a participant was not matched to street in Epic™, we repeated the same procedure for addresses from Epic® that were zip code matches (n = 3 857 addresses). For participants still not matched to an address, we matched them to addresses from legacy files that were street matched (n = 9 006 addresses), keeping only the most recent based on account number, an approximate estimation of chronology. For participants still not matched, we repeated the procedure in order for the following sources and types of match, keeping only the most recent instance: legacy zip code match (n = 2 118 addresses), Epic® city match (n=47 addresses), legacy city match (n = 2 addresses), and unmatched (n = 17 participants).

Once participants’ address(es) were established, we endeavored to match participants to their nearest EPA PM<sub>2.5</sub> monitor. We limited to participants who resided in NC and matched addresses to all visit dates. For each visit date, we calculated the date 365 prior to the visit. We then took

all data from EPA monitors across the state of NC during the period from January 1, 2003 until December 31, 2016. We calculated the first and last dates within that period when each monitor had valid data. We matched all monitors that were active during the entire 365 days prior to participants' visits to their addresses. We calculated the distances between the monitor and the addresses using the latitude and longitude of the addresses and monitors and the geodist function in SAS 9.4. We then kept the nearest monitor to each address for each visit date. We then averaged the daily mean PM<sub>2.5</sub> value for the 365 days prior to each visit.

Co-morbid disease ICD-9 and ICD-10 codes:

International Classification of Disease (ICD)-9 and ICD-10 codes used to determine existing co-morbidities are given below. A \* is used as a wildcard character which was used to capture all subcodes for relevant disease definitions.

Type 2 diabetes: 250, 250.0, 250.00, 250.02, 250.1, 250.10, 250.12, 250.2, 250.20, 250.22, 250.3, 250.30, 250.32, 250.4, 250.40, 250.42, 250.5, 250.50, 250.52, 250.6, 250.60, 250.62, 250.7, 250.70, 250.72, 250.8, 250.80, 250.82, 250.9, 250.90, 250.92, E11.\*

Hypertension: 401\*, I10\*

Dyslipidemia: 272\*, E78\*

Peripheral Arterial Disease: 443\*, I73\*

Chronic Obstructive Pulmonary Disorder (bronchitis): 491\*, J44\*

Emphysema: 492\*, J43\*

Ischemic Heart Disease: 414\*, I20, I21, I22, I23, I24, I25

**Table S1. Associations between all-cause mortality and PM<sub>2.5</sub>.**

| Stratification                           | Model | HR   | LCI  | UCI  | N     | N deaths |
|------------------------------------------|-------|------|------|------|-------|----------|
| None                                     | basic | 1.12 | 1.10 | 1.15 | 23302 | 4496     |
| None                                     | full  | 1.13 | 1.10 | 1.15 | 23012 | 4445     |
| Males                                    | basic | 1.12 | 1.09 | 1.16 | 11224 | 2229     |
| Males                                    | full  | 1.13 | 1.09 | 1.16 | 11075 | 2208     |
| Females                                  | basic | 1.12 | 1.09 | 1.16 | 12078 | 2267     |
| Females                                  | full  | 1.12 | 1.09 | 1.16 | 11937 | 2237     |
| European Americans                       | basic | 1.11 | 1.09 | 1.14 | 14216 | 2953     |
| European Americans                       | full  | 1.12 | 1.09 | 1.15 | 14090 | 2926     |
| African Americans                        | basic | 1.13 | 1.09 | 1.18 | 7063  | 1322     |
| African Americans                        | full  | 1.13 | 1.08 | 1.18 | 6934  | 1300     |
| <50 y                                    | basic | 1.10 | 1.01 | 1.19 | 3253  | 383      |
| <50 y                                    | full  | 1.09 | 1.00 | 1.18 | 3182  | 376      |
| 50-65 y                                  | basic | 1.11 | 1.06 | 1.16 | 6943  | 1126     |
| 50-65 y                                  | full  | 1.11 | 1.06 | 1.16 | 6825  | 1110     |
| ≥65 y                                    | basic | 1.13 | 1.11 | 1.16 | 13106 | 2987     |
| ≥65 y                                    | full  | 1.14 | 1.11 | 1.16 | 13005 | 2959     |
| PM <sub>2.5</sub> < 12 µg/m <sup>3</sup> | basic | 1.11 | 1.07 | 1.14 | 18268 | 2166     |
| PM <sub>2.5</sub> < 12 µg/m <sup>3</sup> | full  | 1.11 | 1.08 | 1.15 | 18055 | 2151     |
| Type 2 diabetes                          | basic | 1.12 | 1.08 | 1.16 | 7853  | 1768     |
| Type 2 diabetes                          | full  | 1.12 | 1.08 | 1.16 | 7741  | 1743     |
| PAD                                      | basic | 1.12 | 1.08 | 1.15 | 8195  | 1767     |
| PAD                                      | full  | 1.12 | 1.08 | 1.16 | 8100  | 1749     |
| COPD                                     | basic | 1.13 | 1.09 | 1.17 | 8293  | 1772     |
| COPD                                     | full  | 1.13 | 1.10 | 1.17 | 8177  | 1747     |
| Dyslipidemia                             | basic | 1.13 | 1.10 | 1.16 | 17215 | 3402     |
| Dyslipidemia                             | full  | 1.13 | 1.10 | 1.16 | 17017 | 3367     |
| Hypertension                             | basic | 1.12 | 1.09 | 1.15 | 17027 | 3482     |
| Hypertension                             | full  | 1.12 | 1.10 | 1.15 | 16815 | 3442     |
| IHD                                      | basic | 1.13 | 1.10 | 1.16 | 13260 | 2871     |
| IHD                                      | full  | 1.13 | 1.10 | 1.16 | 13093 | 2842     |

Associations are given per 1 µg/m<sup>3</sup> increase in PM<sub>2.5</sub>. Associations were stratified on sex, race, Hispanic ethnicity, age at heart failure diagnosis, exposure level, and pre-existing co-morbidities. The "basic" model adjusted for age, race, sex, and distance to the nearest monitor while the "full"

model adjusted for age, sex, race, distance to the nearest monitor, median income, median house value, percent of individuals on public assistance, urbanicity, and percent of households below federal poverty line.

\* COPD = chronic obstructive pulmonary disorder; HR = hazard ratio; IHD = Ischemic heart disease; LCI = lower 95% confidence interval; PAD = peripheral arterial disease; UCI = upper 95% confidence interval

**Table S2. Associations between all-cause mortality and PM<sub>2.5</sub> assessed using modeled PM<sub>2.5</sub> data at 1x1 km resolution.**

| Stratification                           | Model | HR   | LCI  | UCI  | N     | N deaths |
|------------------------------------------|-------|------|------|------|-------|----------|
| None                                     | basic | 1.18 | 1.15 | 1.21 | 23127 | 4480     |
| None                                     | full  | 1.19 | 1.16 | 1.22 | 22841 | 4429     |
| Males                                    | basic | 1.17 | 1.13 | 1.21 | 11146 | 2219     |
| Males                                    | full  | 1.18 | 1.14 | 1.22 | 11001 | 2198     |
| Females                                  | basic | 1.19 | 1.15 | 1.23 | 11981 | 2261     |
| Females                                  | full  | 1.20 | 1.15 | 1.24 | 11840 | 2231     |
| European Americans                       | basic | 1.17 | 1.14 | 1.21 | 14113 | 2945     |
| European Americans                       | full  | 1.18 | 1.15 | 1.22 | 13988 | 2918     |
| African Americans                        | basic | 1.18 | 1.13 | 1.24 | 7004  | 1315     |
| African Americans                        | full  | 1.19 | 1.13 | 1.24 | 6877  | 1293     |
| <50 y                                    | basic | 1.17 | 1.06 | 1.28 | 3214  | 381      |
| <50 y                                    | full  | 1.16 | 1.05 | 1.27 | 3146  | 374      |
| 50-65 y                                  | basic | 1.17 | 1.11 | 1.23 | 6883  | 1124     |
| 50-65 y                                  | full  | 1.18 | 1.12 | 1.24 | 6766  | 1108     |
| ≥65 y                                    | basic | 1.19 | 1.15 | 1.22 | 13030 | 2975     |
| ≥65 y                                    | full  | 1.19 | 1.16 | 1.23 | 12929 | 2947     |
| PM <sub>2.5</sub> < 12 µg/m <sup>3</sup> | basic | 1.18 | 1.14 | 1.22 | 18109 | 2152     |
| PM <sub>2.5</sub> < 12 µg/m <sup>3</sup> | full  | 1.19 | 1.15 | 1.24 | 17900 | 2137     |
| T2D                                      | basic | 1.18 | 1.14 | 1.23 | 7812  | 1765     |
| T2D                                      | full  | 1.19 | 1.14 | 1.24 | 7702  | 1740     |
| PAD                                      | basic | 1.16 | 1.12 | 1.21 | 8135  | 1760     |
| PAD                                      | full  | 1.17 | 1.13 | 1.22 | 8042  | 1742     |
| COPD                                     | basic | 1.19 | 1.15 | 1.24 | 8241  | 1767     |
| COPD                                     | full  | 1.20 | 1.15 | 1.25 | 8127  | 1742     |
| Dyslipidemia                             | basic | 1.18 | 1.15 | 1.21 | 17093 | 3391     |
| Dyslipidemia                             | full  | 1.19 | 1.15 | 1.22 | 16899 | 3356     |
| Hypertension                             | basic | 1.17 | 1.13 | 1.20 | 16903 | 3468     |
| Hypertension                             | full  | 1.18 | 1.14 | 1.21 | 16694 | 3428     |
| IHD                                      | basic | 1.18 | 1.14 | 1.21 | 13169 | 2863     |
| IHD                                      | full  | 1.19 | 1.15 | 1.22 | 13003 | 2834     |
| rural                                    | full  | 1.19 | 1.14 | 1.24 | 7634  | 1534     |
| urban                                    | full  | 1.22 | 1.17 | 1.27 | 8840  | 1697     |



Associations are given per 1  $\mu\text{g}/\text{m}^3$  increase in  $\text{PM}_{2.5}$  with  $\text{PM}_{2.5}$  as assessed using the ensemble model values which have a 1x1 km resolution. Associations were stratified on sex, race, Hispanic ethnicity, age at heart failure diagnosis, exposure level, pre-existing co-morbidities, and urban (100% urban block group) vs rural (bottom 3<sup>rd</sup> of urbanicity distribution;  $\sim < 39\%$  urban) residence based on the 2000 Census block group urbanicity assessment. The "basic" model adjusted for age, race, sex, and distance to the nearest monitor while the "full" model adjusted for age, sex, race, distance to the nearest monitor, median income, median house value, percent of individuals on public assistance, urbanicity, and percent of households below federal poverty line.

\* COPD = chronic obstructive pulmonary disorder; HR = hazard ratio; IHD = Ischemic heart disease; LCI = lower 95% confidence interval; PAD = peripheral arterial disease; UCI = upper 95% confidence interval

**Table S3. Sensitivity analyses based on visit and age at end of observation.**

| Primary Analysis; HR (CI) | pre 1/1/2015; HR (CI) | Age Outlier Removed; HR (CI) | Age at end < 100; HR (CI) | At least 1 prior visit; HR (CI) |
|---------------------------|-----------------------|------------------------------|---------------------------|---------------------------------|
| 1.13 (1.10, 1.15)         | 1.10 (1.07, 1.12)     | 1.13 (1.10, 1.15)            | 1.13 (1.11, 1.16)         | 1.11 (1.08, 1.14)               |

Due to possible bias from lack of observation of deaths, which would result in individuals being “followed” indefinitely, we performed sensitivity analyses based on the age at the end of observation by removing outliers ( $\pm 3$ \*standard deviation; Age Outlier removed) and restricting to those < 100 years old at the end of observation time (Age at end < 100). We also performed a sensitivity analyses restricting to individuals seen before 1/1/2015 (pre 1/1/2015) as more individuals were seen in later years but due to the short follow up time would have had a much lower probability of death. Finally, we examined a sensitivity analysis restricting to individuals with at least one prior visit (At least 1 prior visit). No differences were seen across any of the sensitivity analyses. The full adjustment model was used. Also shown is are the results from the primary analysis for comparison.

\* CI = 95% confidence interval; HR = hazard ratio

**Table S4. Clinical covariates for individuals with diastolic and systolic heart failure.**

|                                            | Diastolic HF (N = 6385) |        |        | Systolic HF (N = 7120) |        |        |
|--------------------------------------------|-------------------------|--------|--------|------------------------|--------|--------|
|                                            | Mean                    | SD     | IQR    | Mean                   | SD     | IQR    |
| Age (y)                                    | 69.7                    | 14.0   | 20.7   | 64.6                   | 15.1   | 21.7   |
| Follow-up time (y)                         | 4.3                     | 3.12   | 4.07   | 3.69                   | 2.69   | 3.06   |
| Distance to monitor (km)                   | 20.0                    | 14.3   | 19.9   | 22.0                   | 15.1   | 21.1   |
| Monitor PM2.5 (ug/m3)                      | 10.2                    | 2.14   | 3.54   | 9.69                   | 1.90   | 3.00   |
| Model PM2.5 (ug/m3)                        | 10.4                    | 1.72   | 2.62   | 9.95                   | 1.45   | 1.40   |
| Households below federal poverty line (%)  | 18.0                    | 14.9   | 18.6   | 18.5                   | 14.8   | 19.5   |
| Median Home Value (\$)                     | 190260                  | 110753 | 122100 | 173793                 | 105746 | 111900 |
| Median Household Income (\$)               | 54092                   | 26870  | 30996  | 51707                  | 26053  | 29709  |
| Urbanicity (%)                             | 64.1                    | 41.7   | 83.6   | 61.1                   | 42.5   | 94.8   |
| Households receiving public assistance (%) | 1.98                    | 3.06   | 2.91   | 2.00                   | 2.97   | 2.91   |
|                                            | N                       | %      |        | N                      | %      |        |
| African American                           | 1987                    | 31.1   |        | 2177                   | 30.6   |        |
| European American                          | 3982                    | 62.4   |        | 4341                   | 61.0   |        |
| Other Race                                 | 416                     | 6.5    |        | 602                    | 8.5    |        |
| Male                                       | 2285                    | 35.8   |        | 4379                   | 61.5   |        |
| Within 30 km of monitor                    | 4992                    | 78.2   |        | 5255                   | 73.8   |        |
| Death (All Cause)                          | 1465                    | 22.9   |        | 1062                   | 14.9   |        |
| Type 2 diabetes                            | 2574                    | 40.3   |        | 2004                   | 28.1   |        |
| IHD                                        | 3833                    | 60.0   |        | 4214                   | 59.2   |        |
| COPD                                       | 2786                    | 43.6   |        | 2159                   | 30.3   |        |
| PAD                                        | 2677                    | 41.9   |        | 2226                   | 31.3   |        |
| Hypertension                               | 5315                    | 83.2   |        | 4714                   | 66.2   |        |
| Dyslipidemia                               | 5303                    | 83.1   |        | 5177                   | 72.7   |        |

BMI = body mass index; COPD = chronic obstructive pulmonary disorder; CVD = cardiovascular disease; IHD = Ischemic heart disease; PAD = peripheral arterial disease; SD = standard deviation

**Table S5. Associations between all-cause mortality and binary PM<sub>2.5</sub> cutoff.**

| Stratification     | Model | HR   | LCI  | UCI  | N     | N deaths |
|--------------------|-------|------|------|------|-------|----------|
| None               | basic | 1.79 | 1.68 | 1.91 | 23302 | 4496     |
| None               | full  | 1.77 | 1.66 | 1.89 | 23012 | 4445     |
| Males              | basic | 1.76 | 1.61 | 1.93 | 11224 | 2229     |
| Males              | full  | 1.75 | 1.60 | 1.92 | 11075 | 2208     |
| Females            | basic | 1.83 | 1.67 | 2.00 | 12078 | 2267     |
| Females            | full  | 1.79 | 1.64 | 1.96 | 11937 | 2237     |
| European Americans | basic | 1.78 | 1.64 | 1.92 | 14216 | 2953     |
| European Americans | full  | 1.76 | 1.63 | 1.91 | 14090 | 2926     |
| African Americans  | basic | 1.81 | 1.61 | 2.03 | 7063  | 1322     |
| African Americans  | full  | 1.76 | 1.57 | 1.98 | 6934  | 1300     |
| <50 y              | basic | 2.03 | 1.63 | 2.51 | 3253  | 383      |
| <50 y              | full  | 1.96 | 1.58 | 2.44 | 3182  | 376      |
| 50-65 y            | basic | 1.74 | 1.53 | 1.97 | 6943  | 1126     |
| 50-65 y            | full  | 1.72 | 1.51 | 1.96 | 6825  | 1110     |
| ≥65 y              | basic | 1.78 | 1.65 | 1.93 | 13106 | 2987     |
| ≥65 y              | full  | 1.76 | 1.63 | 1.91 | 13005 | 2959     |
| Type 2 diabetes    | basic | 1.80 | 1.63 | 1.99 | 7853  | 1768     |
| Type 2 diabetes    | full  | 1.77 | 1.60 | 1.96 | 7741  | 1743     |
| PAD                | basic | 1.63 | 1.47 | 1.80 | 8195  | 1767     |
| PAD                | full  | 1.63 | 1.47 | 1.80 | 8100  | 1749     |
| COPD               | basic | 1.83 | 1.66 | 2.02 | 8293  | 1772     |
| COPD               | full  | 1.81 | 1.64 | 2.00 | 8177  | 1747     |
| Dyslipidemia       | basic | 1.78 | 1.65 | 1.91 | 17215 | 3402     |
| Dyslipidemia       | full  | 1.75 | 1.63 | 1.88 | 17017 | 3367     |
| Hypertension       | basic | 1.78 | 1.65 | 1.91 | 17027 | 3482     |
| Hypertension       | full  | 1.75 | 1.63 | 1.88 | 16815 | 3442     |
| IHD                | basic | 1.79 | 1.66 | 1.94 | 13260 | 2871     |
| IHD                | full  | 1.77 | 1.64 | 1.92 | 13093 | 2842     |

Associations are given based on a binary indicator for annual average PM<sub>2.5</sub> exposure < 12 µg/m<sup>3</sup> (the current EPA annual average standard for PM<sub>2.5</sub>). Associations were stratified on sex, race, Hispanic ethnicity, age at HF diagnosis, exposure level, and pre-existing co-morbidities.

\* COPD = chronic obstructive pulmonary disorder; HR = hazard ratio; IHD = Ischemic heart disease; LCI = lower 95% confidence interval; PAD = peripheral arterial disease; UCI upper 95% confidence interval

**Figure S1. PM<sub>2.5</sub> annual average concentration in 2004 & 2016 using modeled estimates at 1x1 km resolution.**

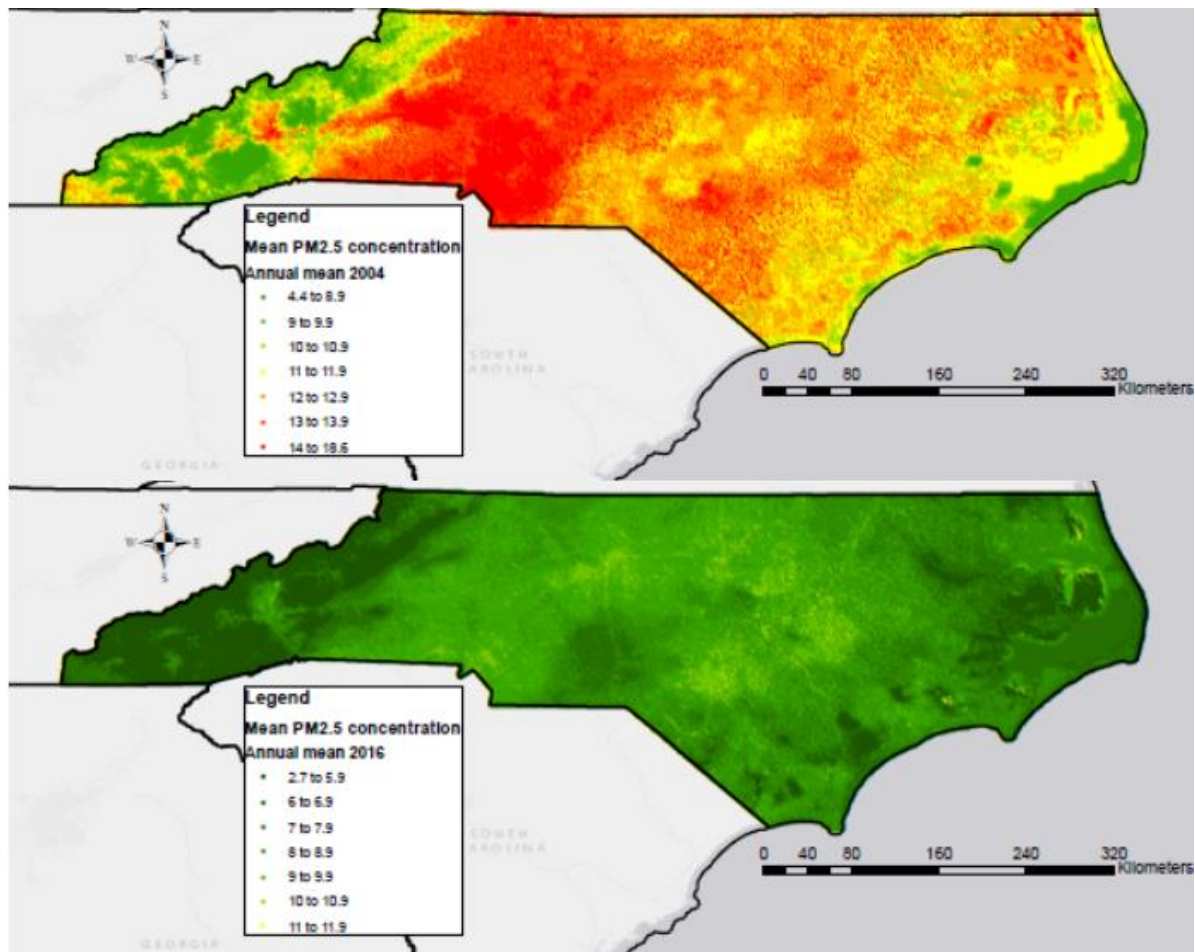

Annual PM<sub>2.5</sub> concentration in NC for the years 2004 (top) and 2016 (bottom).

**Figure S2. PM<sub>2.5</sub> concentration-response curve generated using ground-based PM<sub>2.5</sub> monitoring network.**

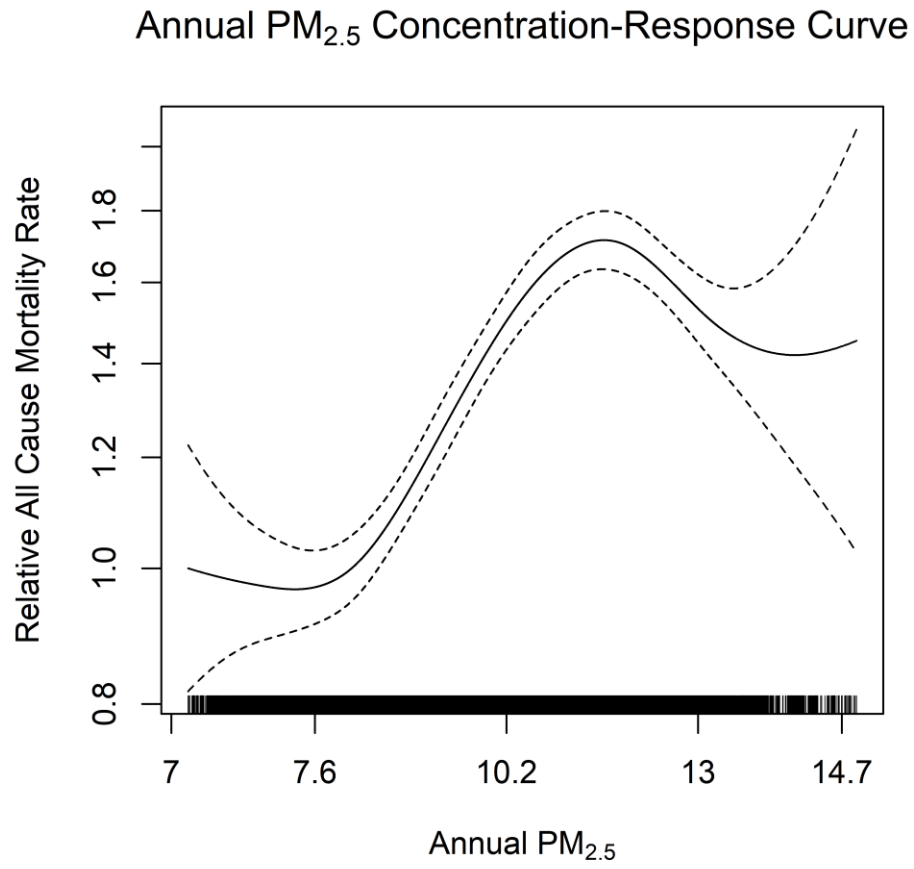

Supplement: JAH3-9-e012517-s001.pdf [file JAH3-9-e012517-s001.pdf]
